# Supplementary material for: Simultaneous extraction of bisphenol A and tetrabromobisphenol A from milk by microwave-assisted ionic liquid microextraction
Source: Royal Society of Chemistry journal article supplement (doi:10.1039/c4ra16098c), 2015-01-01

## SUPPORTING INFORMATION

# Simultaneous extraction of bisphenol A and tetrabromobisphenol A from milk by microwave-assisted ionic liquid microextraction

*Haiyan Kang, Xianli Wang, Yan Zhang, Junfeng Wu\*, Hongqiang Wang*

(School of Municipal and Environmental Engineering, Henan University of Urban Construction, Pingdingshan, 467036, China)

\* Corresponding author. Tel.: +86 375 2089079

E-mail addresses: [wangxianli1223@163.com](mailto:wangxianli1223@163.com) (J.F. Wu)

**Figure S1.** Influence of microwave power on the recoveries of the analytes.

Experimental conditions: IL volume, 150  $\mu\text{L}$ ; extraction time, 5.0 min; pH, 3.0; ionic strength, 5% of NaCl.

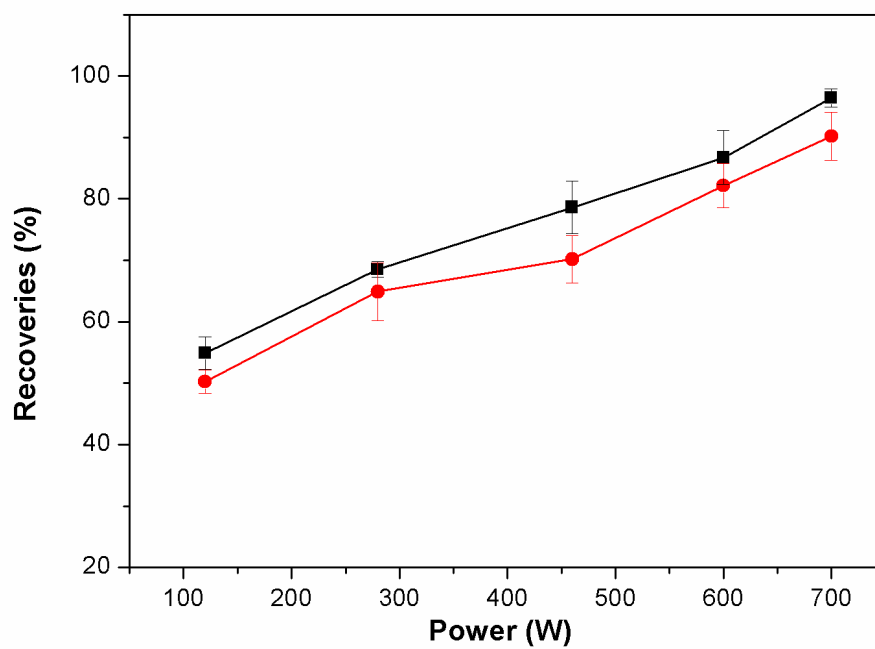

**Figure S2.** Influence of pH on the recoveries of the analytes. Other experimental conditions are as Figure S1.

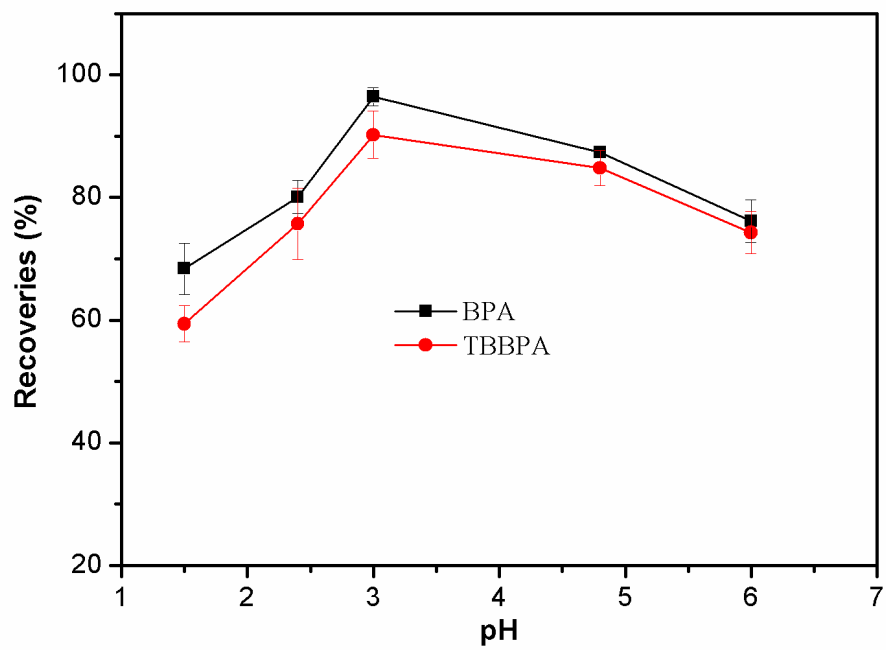

**Figure S3.** Influence of ionic strength on the recoveries of the analytes. Other experimental conditions are as Figure S1.

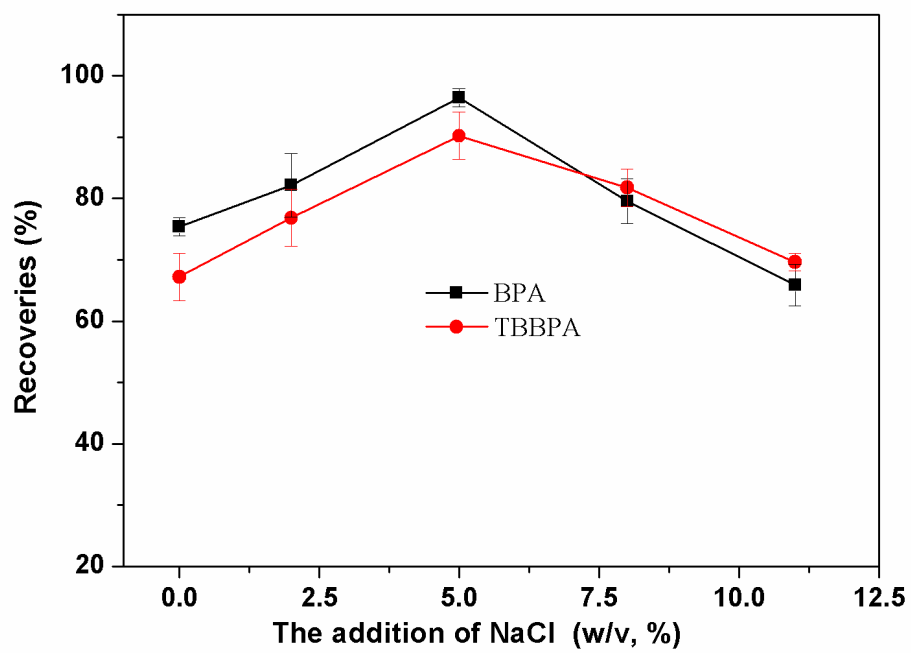

Supplement: c4ra16098c1.pdf [file c4ra16098c1.pdf]
